# Supplementary material for: Novel oxalate-carbonate pathways identified in the tropical dry evergreen forest of Tamil Nadu, India
Source: Copernicus journal article supplement (doi:10.5194/bg-22-6979-2025), 2025-11-20
Supplement: Supplementary file [file bg-22-6979-2025-supplement-title-page.pdf › bg-22-6979-2025-supplement-title-page.pdf]

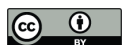

*Supplement of*

## **Novel oxalate-carbonate pathways identified in the tropical dry evergreen forest of Tamil Nadu, India**

**Camille Rieder et al.**

*Correspondence to:* Camille Rieder ([camille.rieder@unil.ch](mailto:camille.rieder@unil.ch))

- [bg-22-6979-2025-supplement-title-page.pdf](#)
- [20251016\\_SI\\_tables\\_Rieder\\_et\\_al\\_TDEF\\_OCP.xlsx](#)
- [20251112\\_Rieder\\_et\\_al\\_SI.pdf](#)

The copyright of individual parts of the supplement might differ from the article licence.
